# Supplementary material for: A mega-cryptic species complex hidden among one of the most common annelids in the North East Atlantic
Source: PubMed Central journal article supplement (PMC6010226; doi:10.1371/journal.pone.0198356), 2018-06-20

137

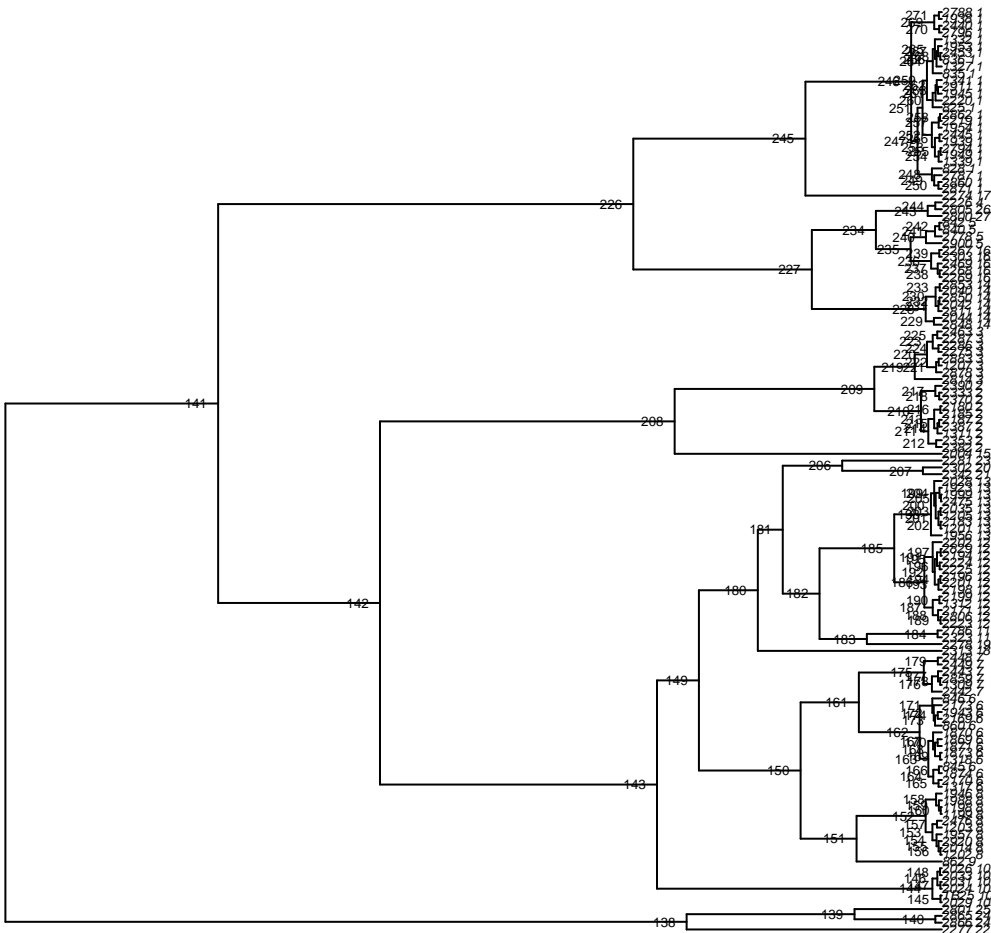

Supplement: pone.0198356.s029.pdf [file pone.0198356.s029.pdf]
